# Supplementary material for: Quantitative summarization of high-touch surfaces and epidemiological parameters of Clostridioides difficile acquisition and transmission for mathematical modeling: a systematic review
Source: Infect Control Hosp Epidemiol. 2025 Oct 15;46(12):1253–61. doi: 10.1017/ice.2025.10302 (PMC12779462; doi:10.1017/ice.2025.10302)
Supplement: Olufadewa et al. supplementary material 3 — Olufadewa et al. supplementary material [file S0899823X25103024sup003.xlsx]

## Sheet: Ranking Information
Ranking	Wang et al. 2021 A. Emergency Department	Wang et al. B Haemodialysis Department	Link et al 2016	Suwanratat et al. 2017	Smith et al. 2012	JInadatha et al. 2017	Hauslage et al 2010 A. ICU	Hauslage et al 2010 B. Medical-Surgical Floor	Cheng et al. 2015		OVERALL Rank Items	Fomite	Colour code
1	Stretcher Rail	Supply cart drawers	Mouse (computer mouse)	Medication Cart	Patient Note	Patient Body	Bed rails	Bed rail	Bedside rail		1	Bedside rail/Stretcher Rail
2	Privacy Curtains	HD Machine Control panel	OR Bed	Wheel Chairs	IV Drip	Computer on wheels	Bed Surface	Over-bed table	Bedside Table		2	Supply/ Laundry Cart drawers or surface
3	Visitors Chair ArmRest	Handwashing Faucet Handle	Nurse Computer Mouse	Food Trays	Computer	Bed rail	Supply Cart	IV pump	Patient Body		3	Bed Surface
4	Patient Bedside Table	Bedside table	OR Door	Laundry Cart	Bed rail/frame	IV pump	IV Pump	Bed surface	Patient File		4	Patient File/Note/Chart
5	Video Translator Machine	HD Machine Keyboard	Medical Cart	Cleaning Carts	Note trolley	Bed Surface	Monitor	IV Tubing	Linen		5	Medication Cart
6	Visitor Chair Back	Bedrail or arm rest	Computer Keyboard	Transfer Gurney	Telephone	Tray Table	IV Tubing	Curtain	Curtain		6	Bedside Table/Tray Table
7	Monitor Wires	Patient Belonging shelf	OR Door Handle	ECG Machines	BP stand	Vital Machine	Monitor Cables	Bedside Table	Bed frame		7	IV Pump/Pole
8	Counter Surfaces	Visitor Chair armrest	Anaesthesia Chair	X-Ray machines	Patient Console	Computer (In-room Computer)	Trash Can	ABHR Dispenser	Locker		8	Vital sign Monitor/Equipment
9	Vital signs Machine	Vital Signs Monitor	Patient Chart	Glucometers	Curtains	Wall shelf	Ventilator Circuit	Call Bell	BP Cuff		9	Phone/Telephone
10	Blood Pressure Cuff	Medication Dispenser	Nurse Phone	Bladder Scanner	Lockers	Door	Suction	Chair	Syringe		10	Curtains/Privacy Curtains
11	Vital signs Monitor	Supply Cart Surface	Anaesthesia Machine Gas Knobs	Weigh scales	Commode		Ventilator	Light Switch	Other items		11	Computer/Computer Keyboard
12	Pulse Oximeter	Nurse Call bell/remote	IV Pole	Bedside Commodes	Stethoscopes		Keyboard	Phone			12	Chair/Visitor Chair armrest
13	Light Switch	Monitor wires	Anaesthesia Machine Computer screen	Vital signs Equipment			Mouse	Trash can			13	Sink Surface/Faucet Handle
14	IV pole	IV pole	Anaesthesia Computer Keyboard	Dopple Ultrasound			Bedside Table	Sink surface			14	BP Cuff/Stand
15	Wall Supply Basket	Dialysis wands	Arm Board	Oxygen Tanks			Over-bed table	Soap Dispenser			15	Computer Mouse
16	Medical Gas Valve	Thermometer					Sink Surround	Paper Towel Dispenser			16	Light switch
17	Ophthalmoscope	Privacy Curtains					Curtain	Suction
18	Otoscope	BP Cuff					ABHR Dispenser	Thermostat
19		TV Monitor					Paper Towel	Oxygen
20		Scale					Soap Dispenser	Thermometer
21							Chair	Keyboard
22							Tubefeed pump	Mouse
23							Light Switch	Linen Hamper
24							Oxygen	SCD
25							Thermometer
26							SCD
27							Linen Hamper
28							Thermostat
29
30

## Sheet: Summary of Included Studies
Table 1: Summary of studies included in the review detailing common high-touch fomites
S/N	First Author & year	Title of article	Method/Study Design	Location/ Study Setting	Study Period	Major Findings	Some highly ranked fomites
1	Wang et al. 2021	Quantitative characterization of high-touch surfaces in emergency departments and hemodialysis facilities	Direct Observational study	Conducted in 2 Emergency Departments and 3 Haemodialysis Facilities	October to November, 2019	1,805 hand-touch episodes observed on 58 surfaces and 320 non-hand contact episodes observed on 6 surfaces	In Emergency department: Stretcher rails, privacy curtains, visitor chair armrest, beside table, video translator machine In haemodialysis facilities: Supply cart drawers, HD machine control panel, handwashing faucet handle, bedside/work table, HD machine keyboard, bed rail or chair armrest
2	Link et al 2016	Determining high touch areas in the operating room with levels of contamination	Two (2) phases were utilized: 1) Descriptive observational study 2) Environmental culture	Conducted in the operating room (in-patient and outpatients)	Not explicitly stated	The highest mean touches was on the computer mouse with 30.53 closely followed by the OR bed with 21.60 mean touches	Anaesthesia Computer mouse, OR bed , nurse computer mouse, OR door, Anaesthesia medical cart
3	Suwantarat et al. 2017	Quantitative assessment of interactions between hospitalized patients and portable medical equipment and other fomites	Direct observation/ monitoring	Conducted in 6 medical-surgical wards and in 2 ICUs conducted from 8am till 5pm during week days	5 months period	Total of 380 interactions recorded during 144 room hours (96 hours in medical-surgical ward and 48 hours in ICU) of observation	Medication carts, wheel chairs, food trays, laundry carts, cleaning carts, transfer gurneys, ECG machines
4	Smith et al. 2012	Where do hands go? An audit of sequential hand-touch events on a hospital ward	Observation – covert observation/ monitoring	Conducted in acute admissions ward in a National Health Service (NHS) hospital	40 x 30 minutes sessions from June – August and Feb – April Performed in the morning, afternoon and night Temporal variations noted - there were more contact epidodes in the summer when compared to the Winter period.	Out of 168 touches observed, notes, IV drip, computer, bed frame/rail, notes trolley and telephone were touched 22%, 12%, 11%, 11% and 9% respectively	Notes, Computer, IV drip, Bed frame or rail, Notes trolley,
5	Jinadatha et al. 2017	Interaction of healthcare worker hands and portable medical equipment: a sequence analysis to show potential transmission opportunities	Direct observation There was a bioburden estimate and sequence analysis which was represented visually by network plots	Six inpatients units (4 acute medical/ surgical units and 2 ICU units) in the 120-bed Veteran affairs (VA) hospital in Temple, TX	144 total hours of observation which involved 274 sequences (with 151 sequences, about 55.1% of total sequences involved movement of portable medical equipment). Observed touch sequences and constructed network plots.	Patients (850), Computer On Wheels (634), Bedrail (375), IV Pump (326), Bed surface (302), Bedside Table (223), Vital machine (213), Wall shelf (110), door (90) and in-room computer (78). T	Patient, computer on wheels, bedrail, IV pump, bed surface, bed side tray table, Vitals machine, in-room computer, wall shelf and door
6	Huslage et al 2010	A Quantitative Approach to Defining “High-Touch” Surfaces in Hospitals	Direct Observation	Seven (7) general medical-surgical floors and 5 ICUs at 780-bed tertiary academic facility at UNC hospitals at Chapel Hill	18 month period (2008 – 2009) 50 interactions observed	Total of 1,490 surface contacts were recorded. 1,109 occurred in the ICU (74.4%) while 381 (25.6%) episode were in the medical-surgical floors. The bed rail, bed surface, supply cart and IV pumps were HTS in the general medical-surgical floors with over 3 contacts per interaction	Bed rails, bed surface, supply cart, IV classified as high touch surface, IV pump monitor, IV tubings among others classified as medium touch surfaces
7	Cheng et al 2015	Hand-touch contact assessment of high-touch and mutual-touch surfaces among healthcare workers, patients, and visitors	Observational study – covert observation	Three 30-bed wards (one acute surgical, one acute medical and one acute neurosurgical ward)	13th January 2014 till 7th March 2014	1,107 person-episodes observed during 66 observation hours. With 899 contacts, the bedside rail was the most frequently touched fomite with 899 contacts and a mean of 13.6 contact episodes per hour, followed by bedside table (812 contacts), patient body, patient file, linen, curtain, bed frame among others	Bedside rail, bedside table, patient’s body, patient file, linen, curtain, bed frame etc
